# Supplementary material for: Semicrystalline polymer networks with a swelling-enhanced water-triggered two-way shape-memory effect for programmable deformation and smart actuation
Source: Royal Society of Chemistry journal article supplement (doi:10.1039/d2py01347a), 2022-01-01
Supplement: d2py01347a1.pdf [file d2py01347a1.pdf]

## Supporting Information

# Semicrystalline polymer networks with swelling enhanced water-triggered two-way shape-memory effect for programmable deformation and smart actuation

*Tao Xiang, \* Jiao Wang, Lianghao Jia, and Shaobing Zhou,\**

Key Laboratory of Advanced Technologies of Materials, Ministry of Education,  
School of Materials Science and Engineering, Southwest Jiaotong University,  
Chengdu 610031, P.R. China

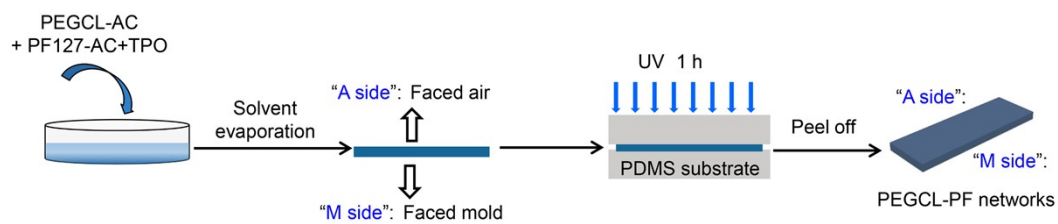

**Fig. S1.** Fabrication process of PEGCL-PF networks.

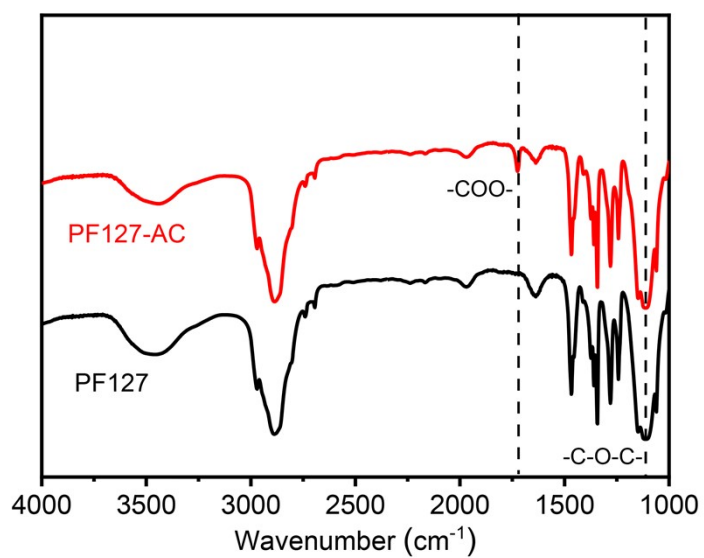

**Fig. S2.** FTIR spectra of PF127 and PF127-AC.

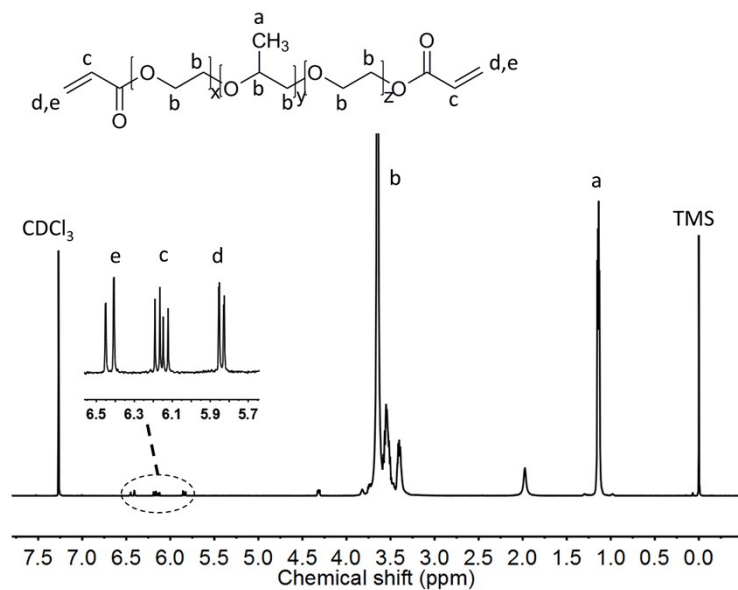

**Fig. S3.**  $^1\text{H}$  NMR spectrum of PF127-AC.

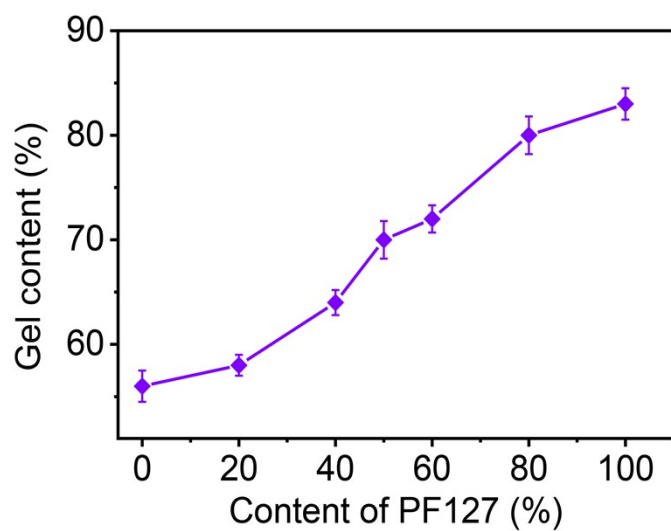

**Fig. S4.** Gel content of PEGCL-PF networks with different PF127 contents.

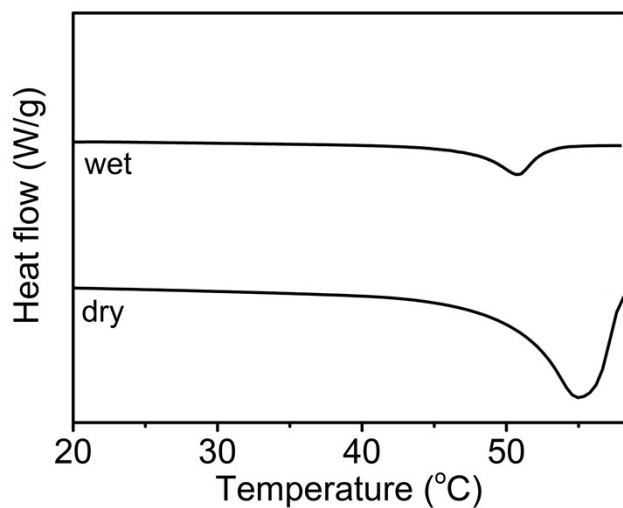

**Fig. S5.** DSC curves of PEGCL-PF<sub>0%</sub> before and after immersing in water for 1 h.

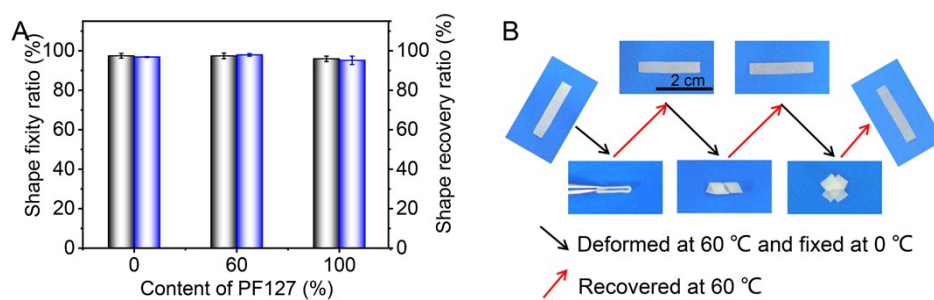

**Fig. S6.** (A) The shape fixity ratio and shape recovery ratio in 1W-SME. (B) The PEGCL-PF was bent or folded into various shapes to investigate the programmable property.
